# Supplementary material for: Unleashing lactoferrin's antidepressant potential through the PI3K/Akt/mTOR pathway in chronic restraint stress rats
Source: Royal Society of Chemistry journal article supplement (doi:10.1039/d3fo02222f), 2023-01-01
Supplement: d3fo02222f1.pdf [file d3fo02222f1.pdf]

## Raw data

### Behavioral tests

#### Splash test

| CTRL | LF CTRL | CRS | CRS+LF | CRS+LF+LY294002 |
|------|---------|-----|--------|-----------------|
| 250  | 252     | 60  | 146    | 62              |
| 245  | 246     | 55  | 160    | 58              |
| 254  | 256     | 65  | 151    | 64              |
| 248  | 250     | 70  | 163    | 68              |
| 252  | 248     | 66  | 154    | 68              |
| 246  | 248     | 68  | 149    | 70              |
| 244  | 247     | 72  | 178    | 74              |
| 255  | 254     | 64  | 159    | 68              |
| 256  | 252     | 62  | 157    | 64              |
| 249  | 250     | 63  | 160    | 65              |

#### Tail Suspension Test

| CTRL | LF CTRL | CRS | CRS+LF | CRS+LF+LY294002 |
|------|---------|-----|--------|-----------------|
| 150  | 148     | 220 | 180    | 218             |
| 145  | 144     | 222 | 175    | 224             |
| 156  | 158     | 225 | 178    | 228             |
| 160  | 157     | 222 | 174    | 220             |
| 155  | 156     | 218 | 182    | 221             |
| 156  | 152     | 224 | 179    | 226             |
| 150  | 153     | 221 | 172    | 222             |
| 152  | 155     | 226 | 170    | 228             |
| 154  | 156     | 228 | 177    | 230             |
| 152  | 150     | 220 | 168    | 222             |

#### Forced Swimming Test

| CTRL | LF CTRL | CRS | CRS+LF | CRS+LF+LY294002 |
|------|---------|-----|--------|-----------------|
| 90   | 92      | 150 | 140    | 152             |
| 96   | 94      | 158 | 135    | 156             |
| 93   | 91      | 155 | 138    | 153             |
| 91   | 92      | 158 | 136    | 160             |
| 92   | 90      | 164 | 132    | 162             |
| 88   | 93      | 156 | 133    | 154             |
| 94   | 95      | 160 | 130    | 156             |
| 90   | 96      | 155 | 131    | 158             |
| 95   | 91      | 152 | 134    | 154             |
| 96   | 98      | 162 | 132    | 160             |

## Neurotransmitters/Hormones

### Serotonin

| CTRL | LF CTRL | CRS  | CRS+LF | CRS+LF+LY294002 |
|------|---------|------|--------|-----------------|
| 39.4 | 39.8    | 7.5  | 32.5   | 7.6             |
| 38.9 | 39.6    | 10.2 | 33.2   | 10.5            |
| 40.1 | 38.9    | 5.9  | 29.6   | 6.1             |
| 38.7 | 39.7    | 8.6  | 31.8   | 8.9             |
| 38.8 | 38.6    | 9.6  | 24.7   | 9.2             |
| 40.2 | 41.5    | 8.9  | 32.9   | 8.9             |

### Cortisone

| CTRL | LF CTRL | CRS   | CRS+LF | CRS+LF+LY294002 |
|------|---------|-------|--------|-----------------|
| 45.2 | 40.3    | 144.6 | 81.6   | 143.8           |
| 45.4 | 43.8    | 183.1 | 64.2   | 185.9           |
| 44.9 | 42.6    | 154.8 | 69.9   | 156.8           |
| 45.1 | 44.4    | 135.7 | 73.7   | 136.9           |
| 44.8 | 43.9    | 189.2 | 65.9   | 189.7           |
| 45.3 | 43.7    | 155.9 | 68.5   | 158.4           |

## Inflammatory mediators

### IL-10

| CTRL  | LF CTRL | CRS  | CRS+LF | CRS+LF+LY294002 |
|-------|---------|------|--------|-----------------|
| 58.2  | 59.5    | 17.5 | 45.8   | 17.9            |
| 60.7  | 61.8    | 12.3 | 34.4   | 14.9            |
| 59.35 | 60.7    | 19.2 | 43.3   | 18.9            |
| 62.3  | 64.6    | 20.3 | 42.7   | 20.8            |
| 63.52 | 62.1    | 14.4 | 44.9   | 19.9            |
| 57.42 | 58.5    | 19.8 | 38.8   | 16.7            |

### NF-κB

| CTRL  | LF CTRL | CRS    | CRS+LF | CRS+LF+LY294002 |
|-------|---------|--------|--------|-----------------|
| 0.115 | 0.323   | 12.604 | 1.321  | 10.64           |
| 0.272 | 0.413   | 14.059 | 1.442  | 11.35           |
| 0.349 | 0.445   | 14.626 | 1.117  | 10.99           |
| 0.296 | 0.272   | 12.155 | 1.442  | 12.54           |
| 0.323 | 0.349   | 10.978 | 1.211  | 12.89           |

## TNF- $\alpha$

| CTRL  | LF CTRL | CRS   | CRS+LF | CRS+LF+LY294002 |
|-------|---------|-------|--------|-----------------|
| 0.139 | 0.288   | 6.924 | 0.165  | 5.98            |
| 0.144 | 0.248   | 5.513 | 0.244  | 6.35            |
| 0.127 | 0.213   | 4.109 | 0.354  | 6.98            |
| 0.122 | 0.333   | 7.971 | 0.423  | 7.25            |
| 0.367 | 0.236   | 5.692 | 0.374  | 5.89            |

## Oxidative stress

### GSH

| CTRL | LF CTRL | CRS  | CRS+LF | CRS+LF+LY294002 |
|------|---------|------|--------|-----------------|
| 64.2 | 65.4    | 18.7 | 50.2   | 18.6            |
| 65.1 | 62.7    | 18.5 | 43.6   | 17.9            |
| 63.8 | 64.3    | 14.8 | 53.6   | 14.7            |
| 64.9 | 63.2    | 18.9 | 45.9   | 18.7            |
| 63.7 | 64.1    | 19.1 | 57.2   | 19.5            |
| 64.5 | 63.8    | 19.6 | 55.8   | 19.4            |

### TBARS

| CTRL | LF CTRL | CRS  | CRS+LF | CRS+LF+LY294002 |
|------|---------|------|--------|-----------------|
| 7.6  | 7.2     | 26.5 | 9.8    | 25.7            |
| 6.5  | 6.9     | 30.9 | 8.7    | 30.1            |
| 7.1  | 6.8     | 29.8 | 11.4   | 28.6            |
| 6.5  | 6.6     | 31.4 | 10.3   | 30.2            |
| 6.7  | 6.7     | 25.9 | 10.7   | 25.3            |
| 5.9  | 7.1     | 26.9 | 9.8    | 26.4            |

## PI3K/Akt/mTOR/GSK-3 $\beta$ signaling

### PI3K

| CTRL | LF CTRL | CRS  | CRS+LF | CRS+LF+LY294002 |
|------|---------|------|--------|-----------------|
| 60.2 | 61.9    | 21.4 | 40.2   | 21.1            |
| 62.1 | 63.1    | 17.5 | 48.7   | 17.8            |
| 65.6 | 64.3    | 20.8 | 46.1   | 20.3            |
| 63.8 | 64.4    | 18.9 | 48.6   | 17.8            |
| 66.4 | 62.7    | 14.7 | 45.9   | 16.1            |
| 65.1 | 65.7    | 16.7 | 47.8   | 16.7            |

## Akt

| CTRL | LF CTRL | CRS  | CRS+LF | CRS+LF+LY294002 |
|------|---------|------|--------|-----------------|
| 0.77 | 0.76    | 0.55 | 0.58   | 0.56            |
| 0.78 | 0.75    | 0.51 | 0.67   | 0.53            |
| 0.76 | 0.79    | 0.4  | 0.73   | 0.45            |
| 0.79 | 0.81    | 0.45 | 0.78   | 0.47            |
| 0.74 | 0.76    | 0.49 | 0.72   | 0.43            |
| 0.76 | 0.71    | 0.57 | 0.69   | 0.52            |

## mTOR

| CTRL | LF CTRL | CRS  | CRS+LF | CRS+LF+LY294002 |
|------|---------|------|--------|-----------------|
| 5.8  | 5.6     | 0.87 | 2.2    | 0.89            |
| 6.5  | 6.2     | 0.96 | 1.7    | 0.56            |
| 5.4  | 5.5     | 0.67 | 2.1    | 0.64            |
| 6.2  | 6.4     | 0.82 | 3.2    | 0.8             |
| 5.3  | 6.1     | 0.91 | 3.5    | 0.87            |
| 5.9  | 5.3     | 0.93 | 3.8    | 0.92            |

## GSK-3 $\beta$

| CTRL | LF CTRL | CRS  | CRS+LF | CRS+LF+LY294002 |
|------|---------|------|--------|-----------------|
| 1.85 | 1.65    | 6.55 | 2.34   | 6.13            |
| 1.73 | 1.76    | 7.42 | 2.17   | 7.11            |
| 1.78 | 1.73    | 5.91 | 2.39   | 6.12            |
| 1.74 | 1.72    | 6.3  | 2.71   | 7.45            |
| 1.81 | 1.86    | 6.82 | 2.23   | 7.1             |
| 1.71 | 1.78    | 6.45 | 2.48   | 6.34            |

## BDNF

| CTRL | LF CTRL | CRS  | CRS+LF | CRS+LF+LY294002 |
|------|---------|------|--------|-----------------|
| 42.3 | 42.8    | 8.7  | 24.3   | 9.7             |
| 51.7 | 43.9    | 11.3 | 30.7   | 11.6            |
| 42.8 | 43.3    | 9.9  | 34.3   | 7.3             |
| 44.5 | 44.8    | 9.5  | 33.8   | 10.9            |
| 45.6 | 43.9    | 10.6 | 29.5   | 10.8            |
| 44.9 | 44.8    | 11.4 | 28.9   | 10.8            |

## Histology Score

| CTRL | LF CTRL | CRS  | CRS+LF | CRS+LF+LY294002 |
|------|---------|------|--------|-----------------|
| 0    | 0       | 2.5  | 0      | 2.5             |
| 0    | 0       | 2.5  | 0      | 2.5             |
| 0    | 0       | 2.5  | 0      | 2.75            |
| 0    | 0       | 2.25 | 0.5    | 2.5             |
| 0    | 0       | 2.5  | 0.25   | 2.75            |
| 0    | 0       | 2.5  | 0      | 2.5             |
| 0    | 0       | 2.5  | 0      | 2.5             |
| 0    | 0       | 2.5  | 0      | 2.75            |
| 0    | 0       | 2.25 | 0.5    | 2.5             |
| 0    | 0       | 2.5  | 0.25   | 2.75            |
