# Supplementary figures and images for: Unleashing lactoferrin's antidepressant potential through the PI3K/Akt/mTOR pathway in chronic restraint stress rats
Source: Royal Society of Chemistry journal article supplement (doi:10.1039/d3fo02222f), 2023-01-01

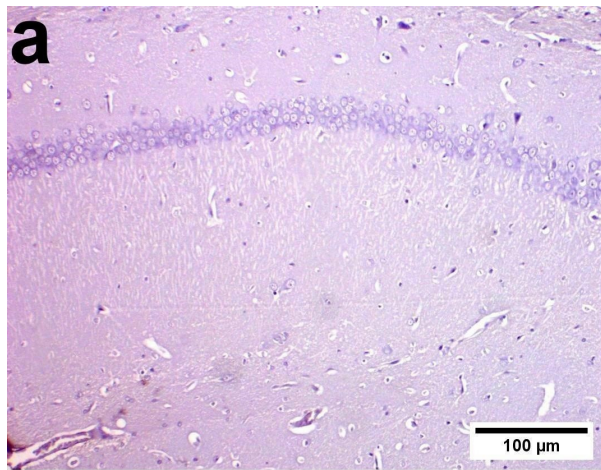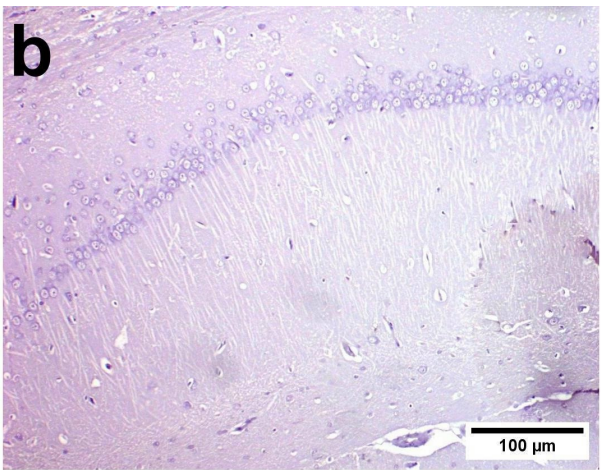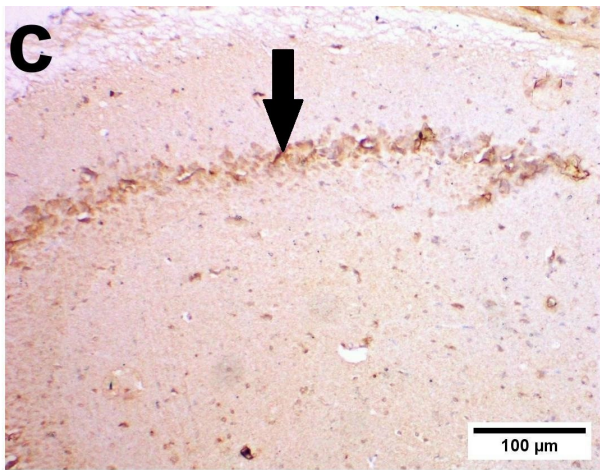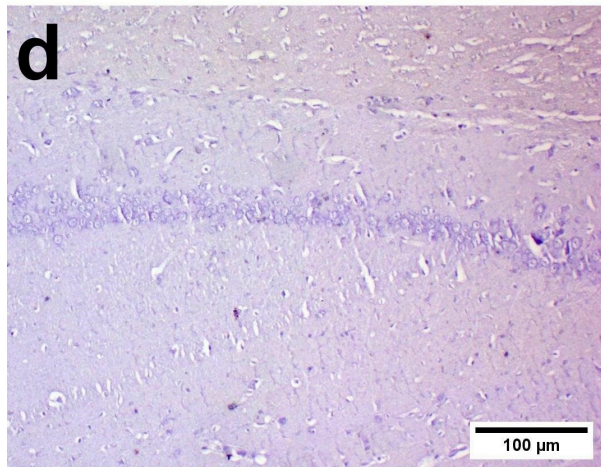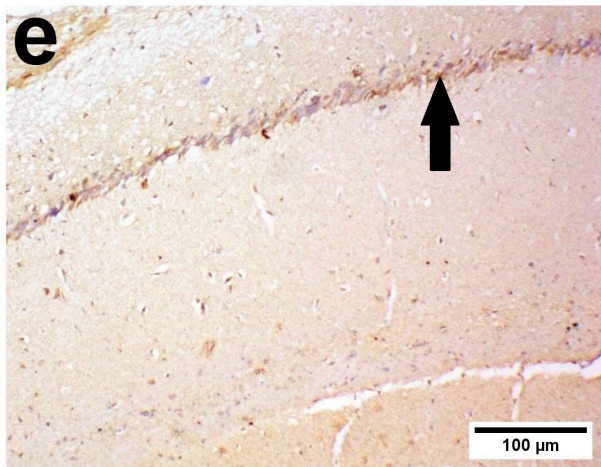

Supplement: d3fo02222f3.pdf [file d3fo02222f3.pdf]
